# Supplementary material for: Indoleamine 2, 3-Dioxygenase Promotes Aryl Hydrocarbon Receptor-Dependent Differentiation Of Regulatory B Cells in Lung Cancer
Source: PubMed Central journal article supplement (PMC8640488; doi:10.3389/fimmu.2021.747780), 2021-11-19
Supplement: DataSheet_1.pdf [file DataSheet_1.pdf]

# Supplementary Figure 1

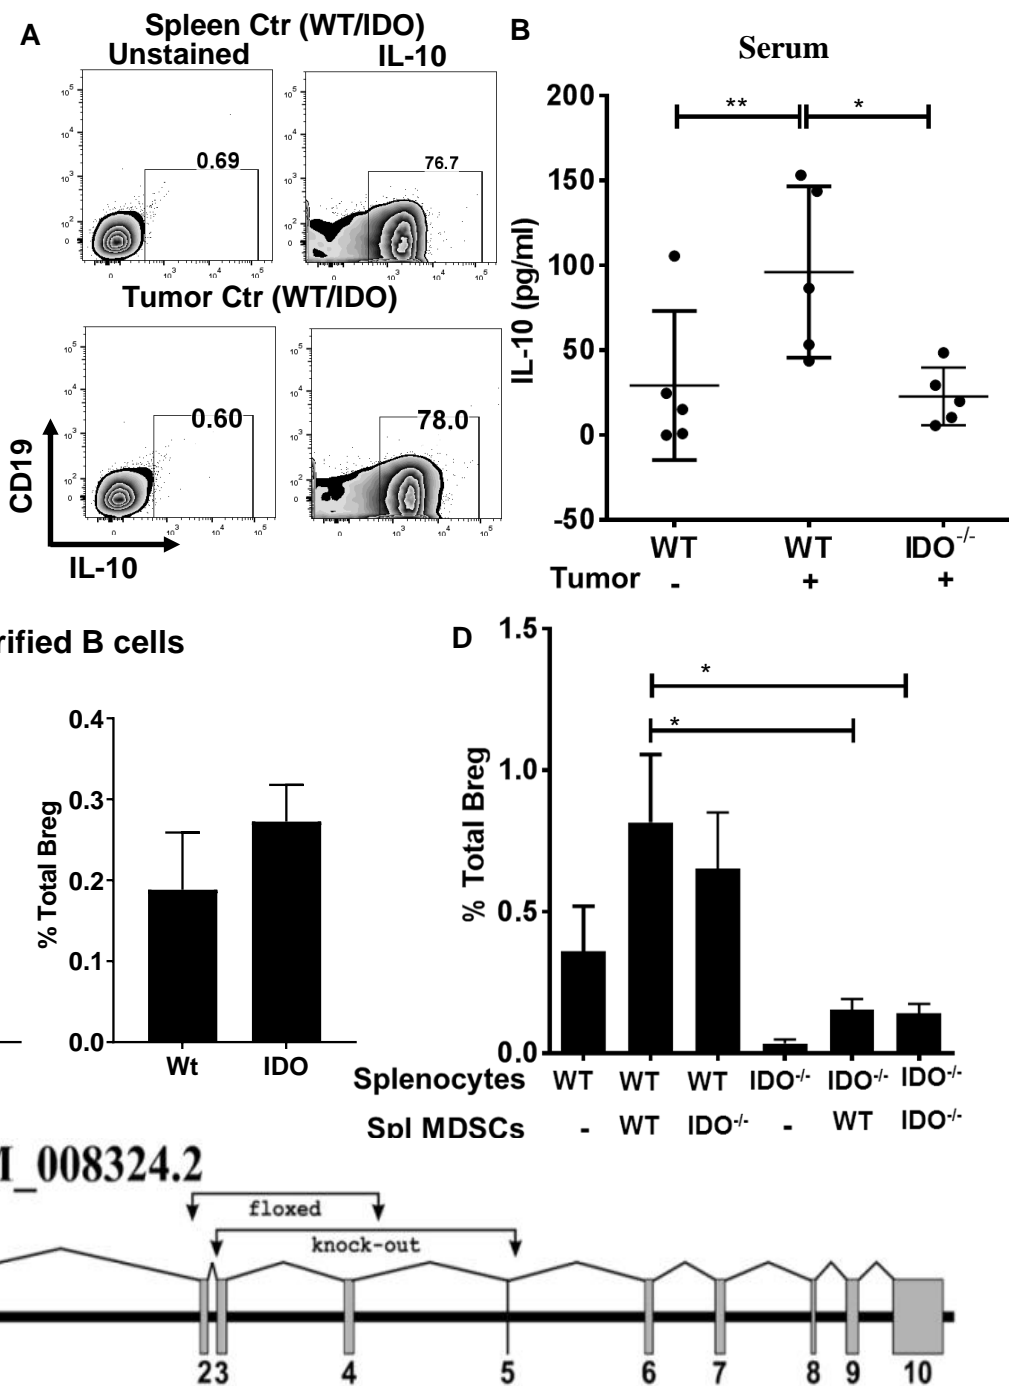

## Supplementary Figure 1- IDO regulates IL-10 level in sera of tumor bearing mice and MDSCs mediated IDO promotes Breg differentiation in splenic milieu.

(A) Gating strategy of IL-10 in WT/IDO spleen and tumor. (B) IL-10 levels were elevated in the mouse sera of tumor bearing WT compared to naïve WT and tumor bearing IDO<sup>-/-</sup> on day 9 post tumor implant (n=5 mice per group). (C) Breg precursors and Breg percentage in purified B cells from WT/IDO<sup>-/-</sup> before culturing with MDSCs (D) Whole splenocytes of WT and IDO<sup>-/-</sup> naïve mice were co-cultured in 5:1 ratio with MDSCs sorted from spleen of tumor bearing WT and IDO<sup>-/-</sup> and incubated for 72 hrs. Bregs were identified in the co-culture as CD19<sup>+</sup>CD5<sup>+</sup>CD1d<sup>hi</sup>IL-10<sup>+</sup> by flow cytometry. Data shown here are representative of two independent experiments with three replicates for each group and represent the mean ± STDEV values. \*p < 0.05. (E) Figure drawn to approximate scale, illustrates the region targeted for excision by Cre recombinase compared to the region deleted in the JAX *Ido1*KO strain, 005867 to target *Ido1* inactivation in myeloid-derived cells

# Supplementary Figure 2

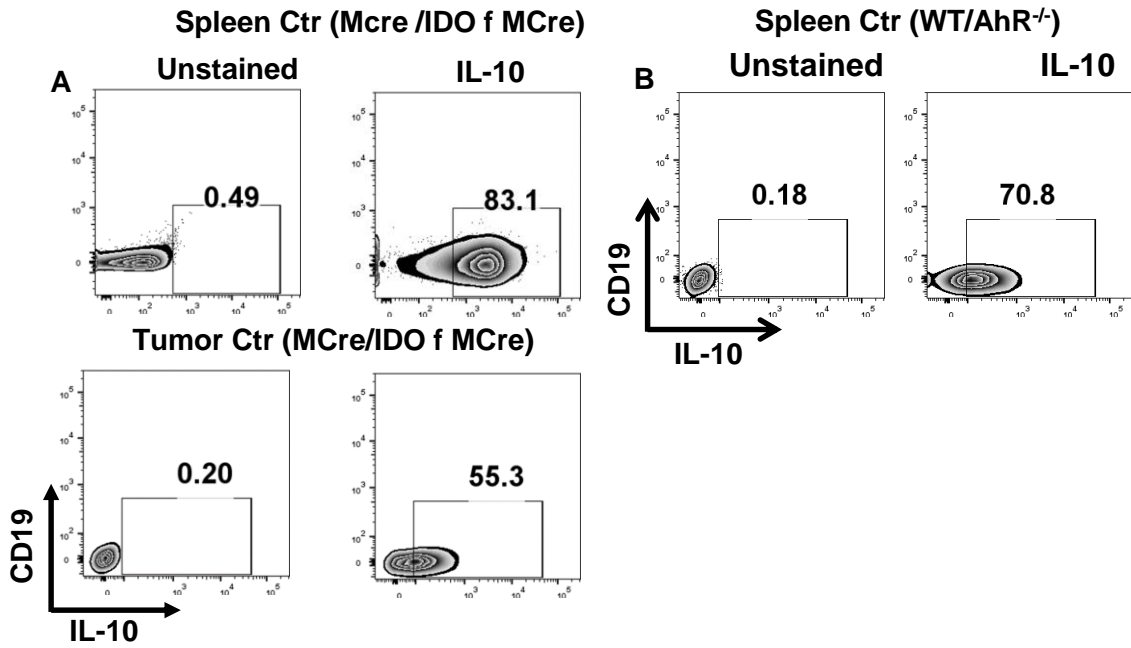

**Supplementary Figure 2-** (A) Gating strategy of IL-10 in MCre/IDO f MCre spleen and tumor. (B) Gating strategy of IL-10 in WT/AhR<sup>-/-</sup> spleen

# Supplementary Figure 3

## Purified B cells

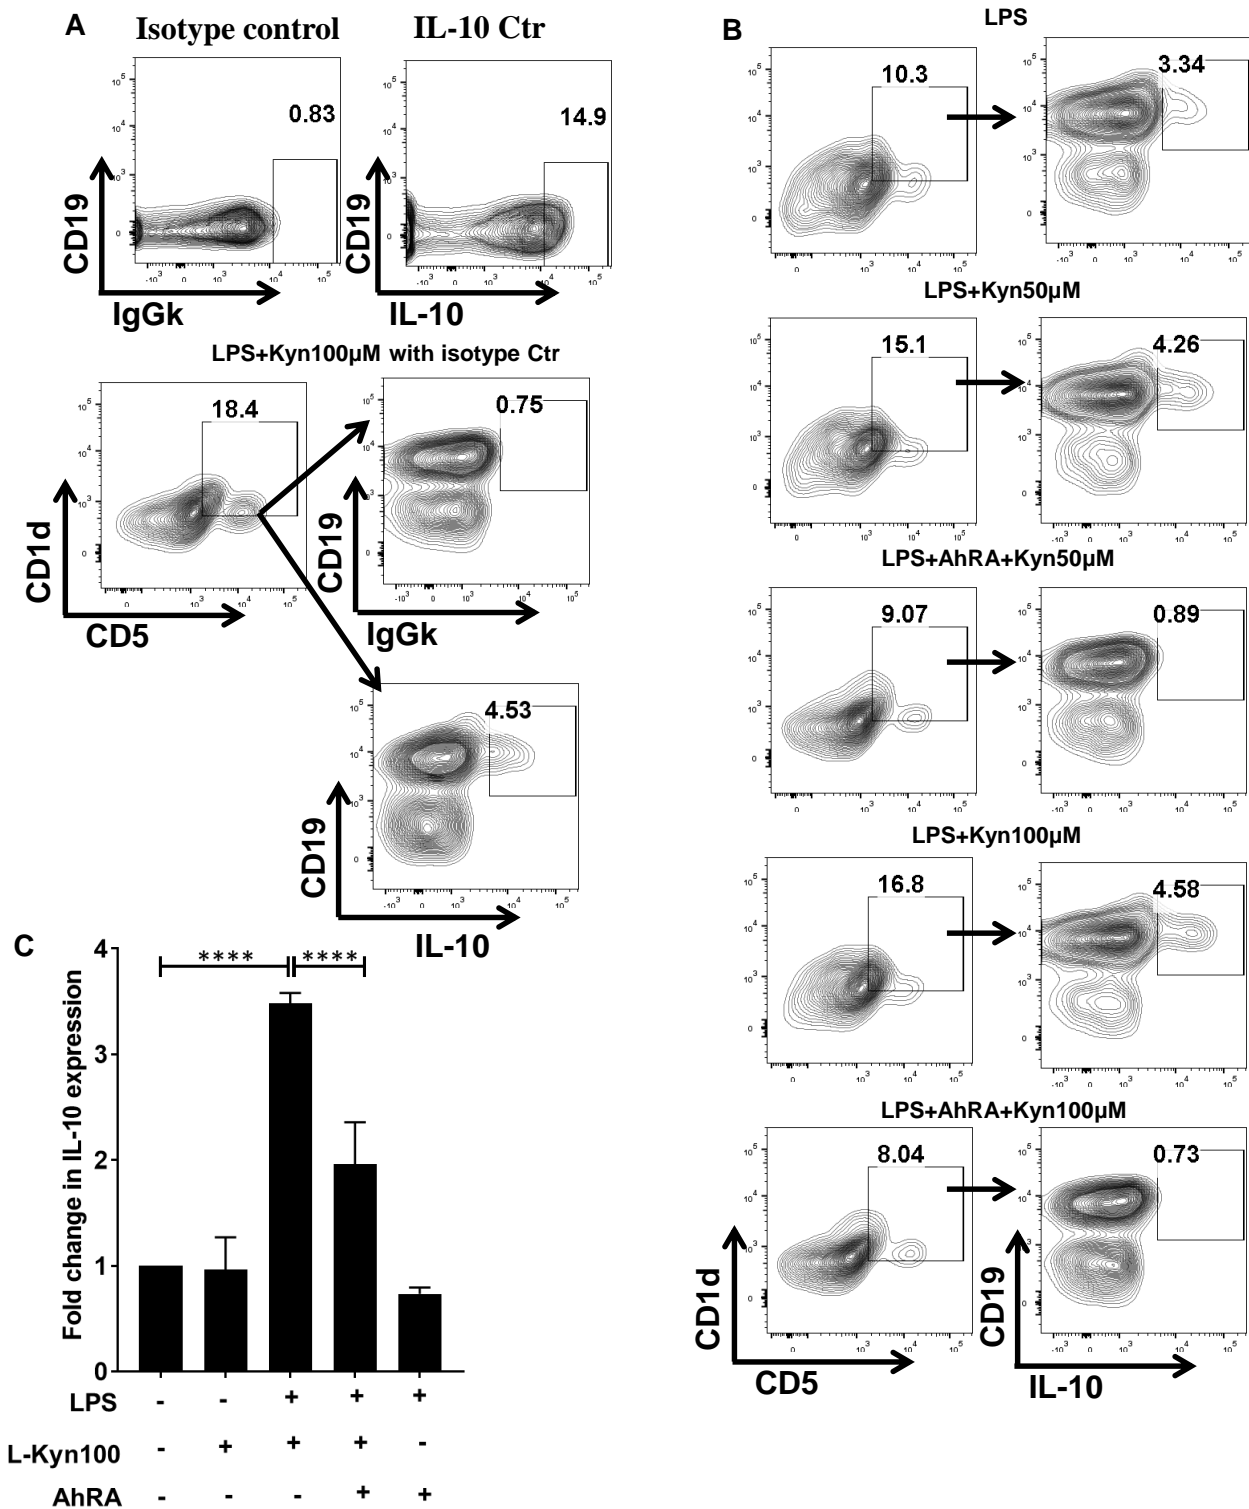

**Supplementary Figure 3- L-Kyn promoted IL-10 producing Bregs (CD19<sup>+</sup>CD5<sup>+</sup>CD1d<sup>hi</sup>IL-10<sup>+</sup>)** (A) Representative flow cytometry contour plot showing IL-10 gating with isotype control. (B) Representative flow cytometry contour plot showing in-vitro induction of Bregs (CD19<sup>+</sup>CD5<sup>+</sup>CD1d<sup>hi</sup>IL-10<sup>+</sup>) with LPS+L-Kyn while AhRA with LPS+L-Kyn inhibited Bregs (C) CD19<sup>+</sup> B cells were negatively selected from whole splenocytes of WT mice, disaggregated and seeded with LPS (10μg/ml), L-Kyn (100μM) and LPS + L-Kyn + CH 223191(10μM) an aryl hydrocarbon receptor antagonist (AhRA) for 72 hrs IL-10 expression was assessed by qRT-PCR in the cells collected from *ex-vivo* experiments performed with purified B cells in experimental conditions described above

(C) CD19<sup>+</sup> B cells were negatively selected from whole splenocytes of WT mice, disaggregated and seeded with LPS (10μg/ml), L-Kyn (100μM) and LPS + L-Kyn + CH 223191(10μM) an aryl hydrocarbon receptor antagonist (AhRA) for 72 hrs IL-10 expression was assessed by qRT-PCR in the cells collected from *ex-vivo* experiments performed with purified B cells in experimental conditions described above

# Supplementary Figure 4

## Purified B cells

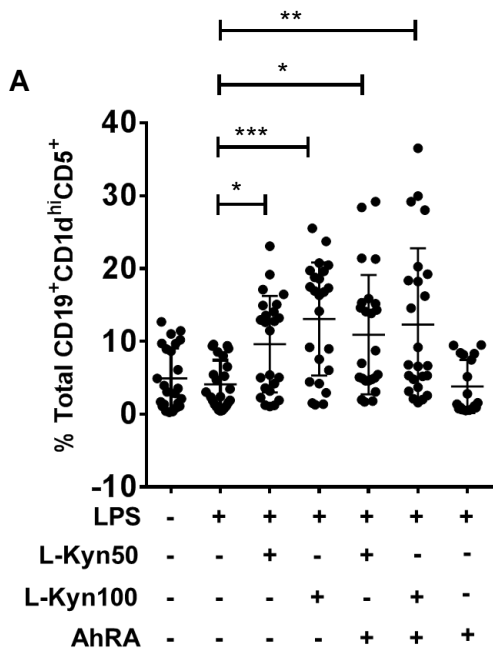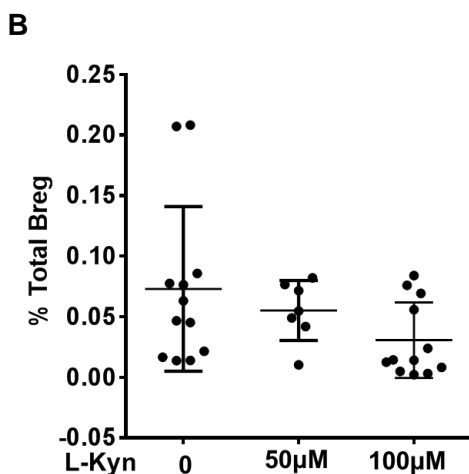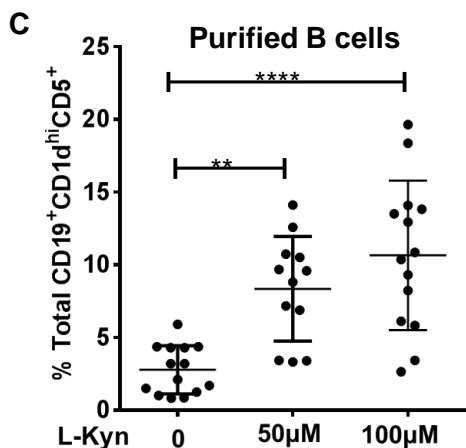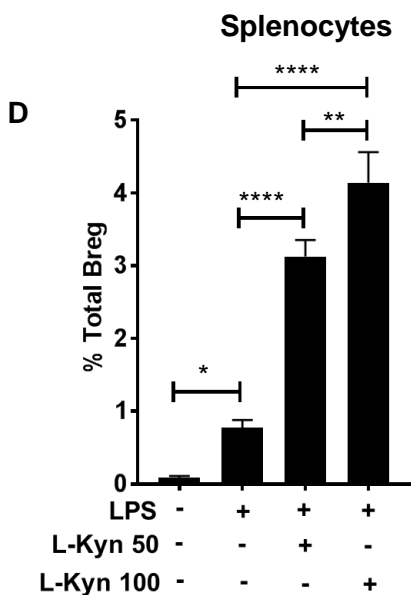

**Supplementary Figure 4- L-Kyn promoted Breg precursors (CD19<sup>+</sup>CD5<sup>+</sup>CD1d<sup>hi</sup>) in AhR independent and LPS required to make them Breg. (A) Total percentage of Breg precursors (CD19<sup>+</sup>CD5<sup>+</sup>CD1d<sup>hi</sup>) in *ex-vivo* experiments performed with negatively selected purified B cells following stimulation with no LPS, LPS, LPS+L-Kyn, LPS+AhRA+L-Kyn, and LPS+AhRA. Data shown here are pooled from six independent experiments with 3 technical replicates in each condition (B) Total percentage of Breg (CD19<sup>+</sup>CD5<sup>+</sup>CD1d<sup>hi</sup>IL-10<sup>+</sup>) in *ex-vivo* experiments performed with negatively selected purified B cells following stimulation with no LPS and different concentration of L-Kyn (50µM, 100µM), Data shown here are pooled from 2-4 independent experiments with 3 technical replicates in each condition (C) Total percentage of Breg precursors (CD19<sup>+</sup>CD5<sup>+</sup>CD1d<sup>hi</sup>) in *ex-vivo* experiments performed with negatively selected purified B cells following stimulation with no LPS and different concentration of L-Kyn (50µM, 100µM), Data shown here are pooled from 3-4 independent experiments with 3 technical replicates in each condition. (D) Whole splenocytes of WT mice disaggregated and seeded with LPS (10µg/ml) and increasing concentrations of L-Kyn (50µM and 100µM) for 72 hrs. Cells were then stained with antibodies (CD19, CD5, CD1d and IL-10). Flow cytometry was performed to identify Breg. Data shown here are representative of 3 independent experiments with 3 technical replicates in each condition \*p < 0.05, \*\*p < 0.001, \*\*\*p < 0.0001,\*\*\*\*p < 0.00001.**

# Supplementary Figure 5

## Purified B cells

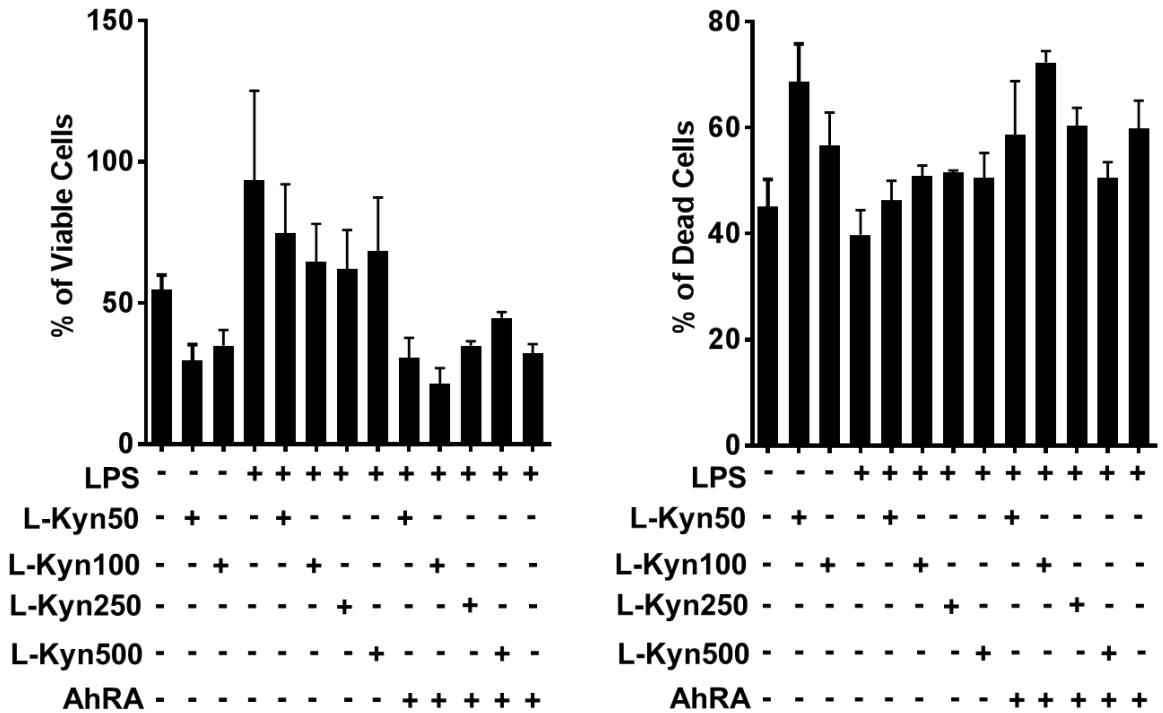

**Supplementary Figure 5 – Cytotoxicity of L-Kyn on B cells.** CD19<sup>+</sup> B cells were negatively selected from whole splenocytes of WT mice, disaggregated and seeded with LPS (10µg/ml), increasing concentrations of L-Kyn (50µM, 100µM, 250µM and 500µM) and LPS + L-Kyn + an aryl hydrocarbon receptor antagonist (AhRA) CH 223191 (10µM) for 72 hrs. Viability assay was performed with trypan blue staining to identify live and dead cells.

# Supplementary Figure 6

## Purified B cells

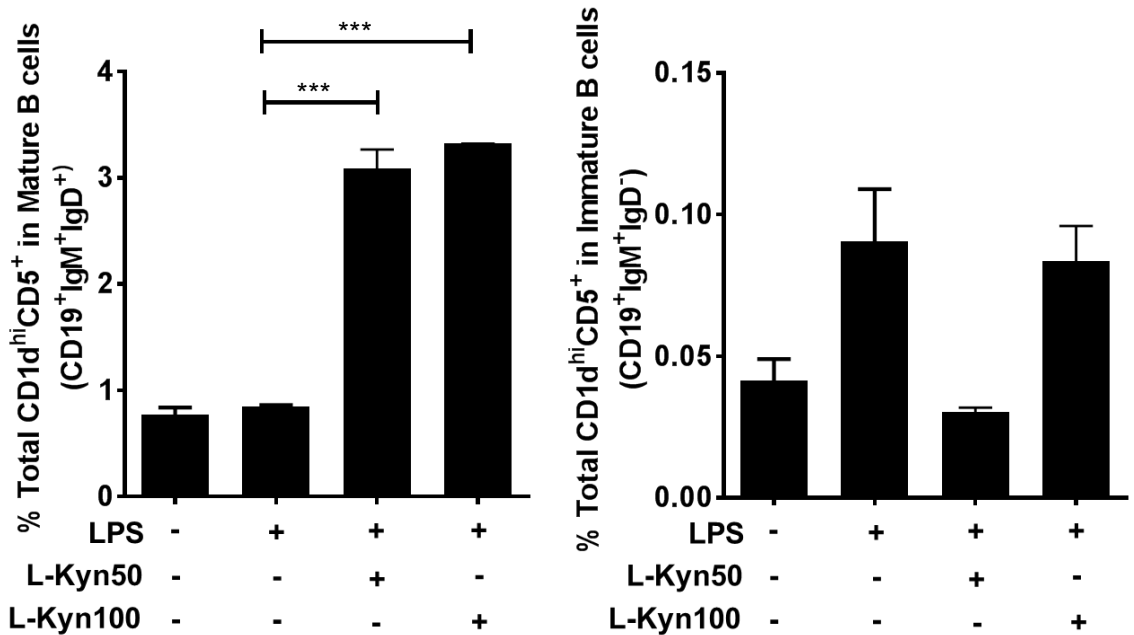

**Supplementary Figure 6- L-Kyn differentiated Breg from Mature B cells.** Left panel-Total percentage of Breg precursors (CD19+CD5+CD1d<sup>hi</sup>) from mature B cells (IgM<sup>+</sup>IgD<sup>+</sup>) and right panel -Total percentage of Breg precursors (CD19+CD5+CD1d<sup>hi</sup>) from immature B cells (IgM<sup>+</sup>IgD<sup>-</sup>) in ex-vivo experiments performed with negatively selected purified B cells from bone marrow (BM) of WT mice following stimulation with LPS and different concentration of LPS+L-Kyn (50μM, 100μM) \*p < 0.05, \*\*p < 0.001, \*\*\*p < 0.0001.

# Supplementary Figure 7

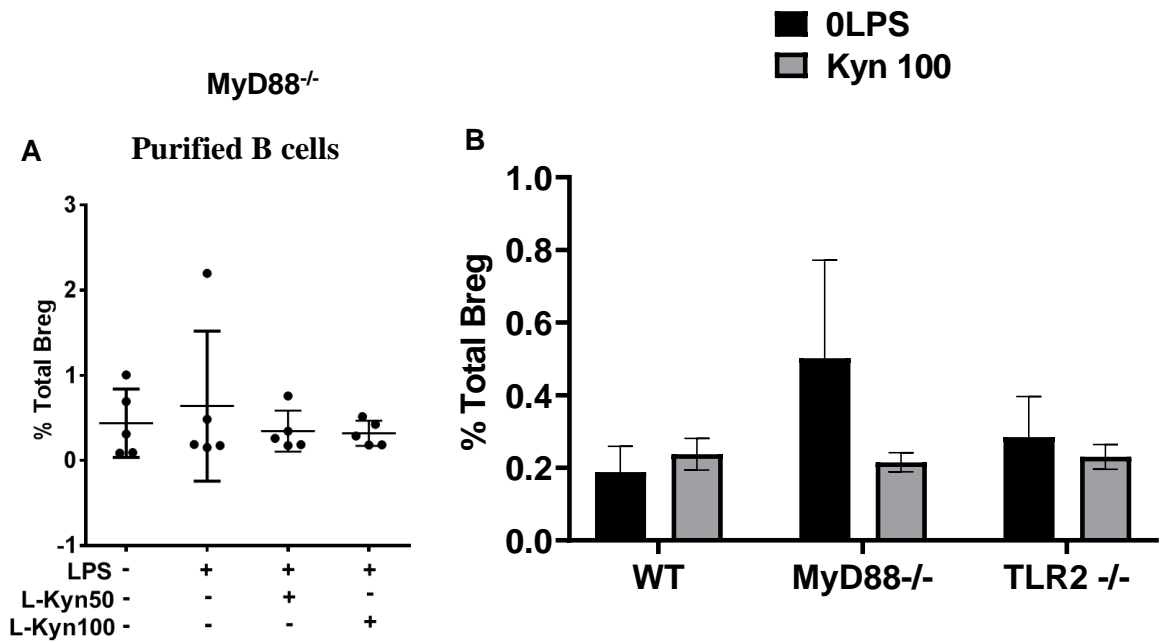

**Supplementary Figure 7 - L-Kynurenine induced Breg differentiation was MyD88 dependent** (A) L-Kyn induced Breg differentiation was impaired in B cells of MyD88<sup>-/-</sup> following stimulation with LPS+L-Kyn. (B) No Breg differentiation in B cells of WT, MyD88<sup>-/-</sup> and TLR2<sup>-/-</sup> following stimulation with only L-Kyn.

# Supplementary Figure 8

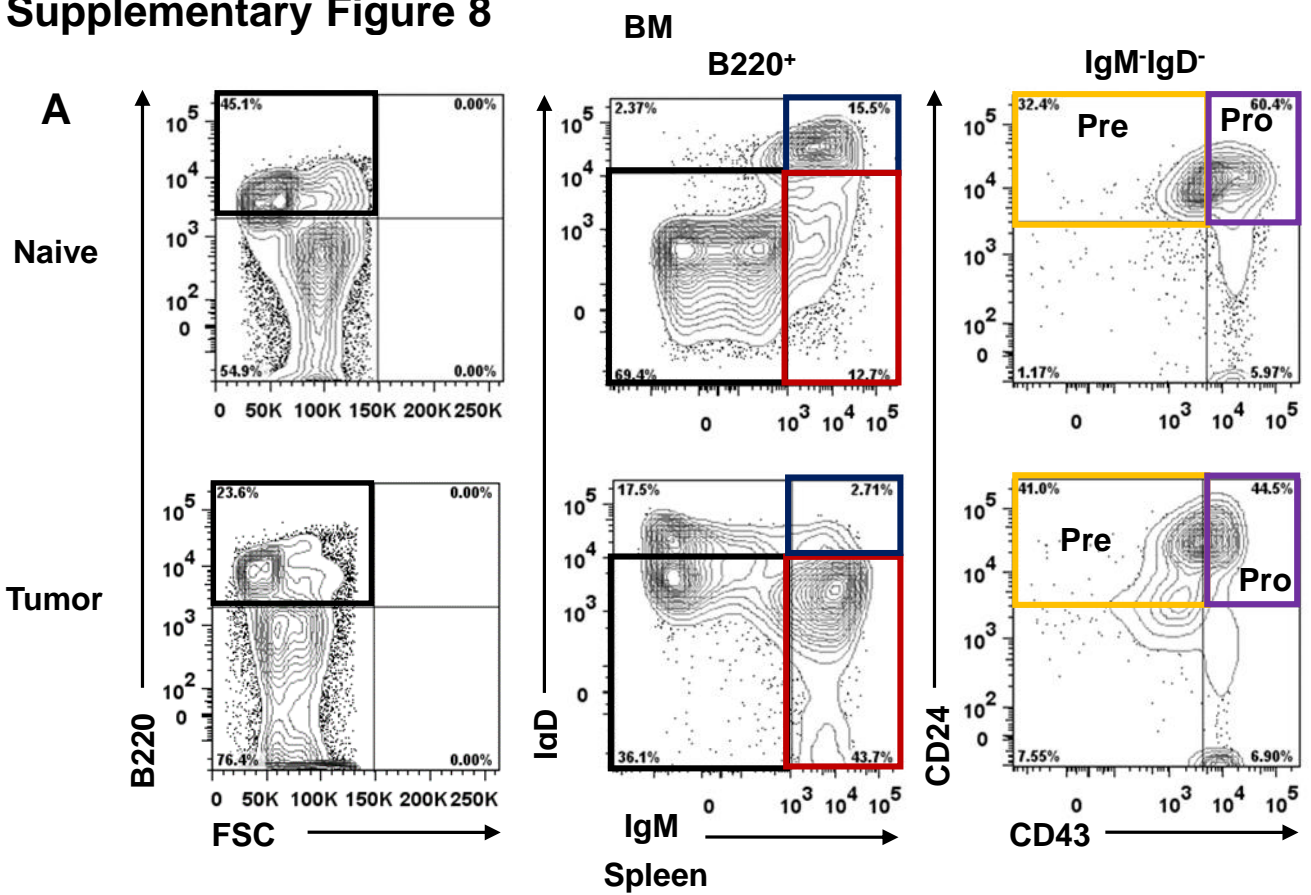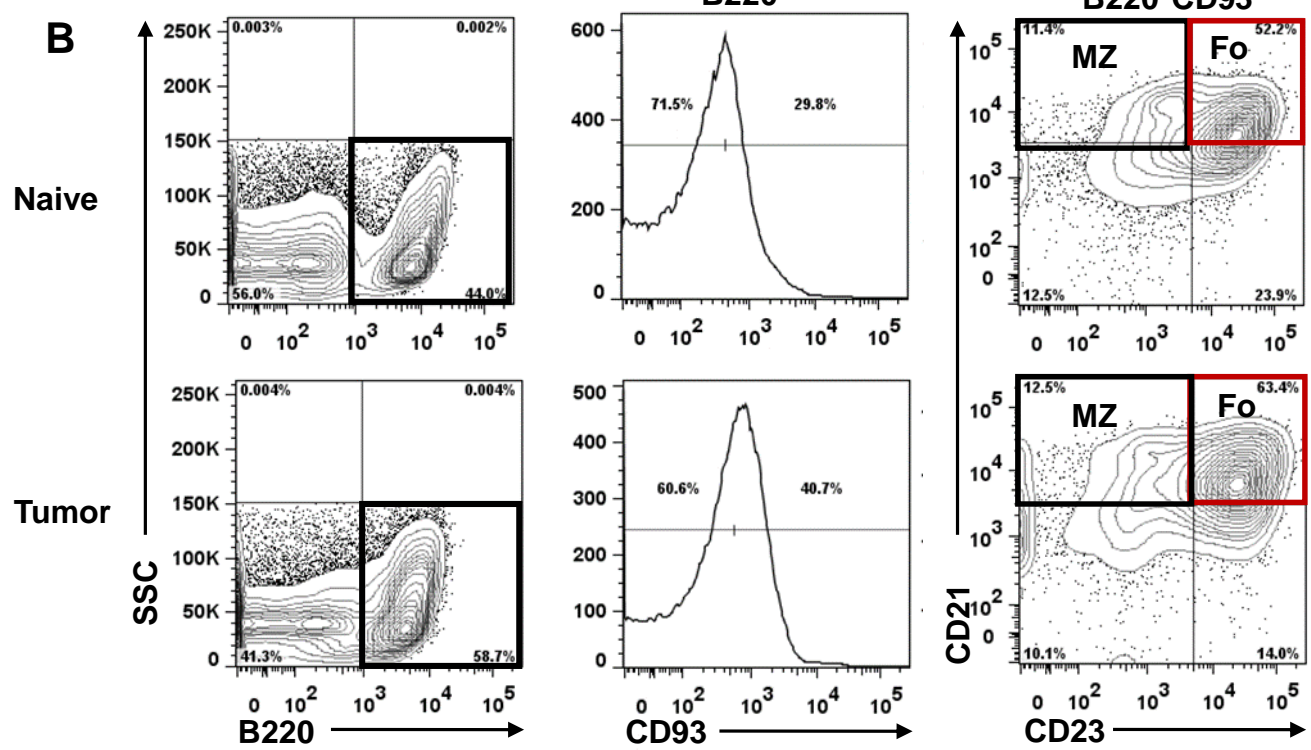

**Supplementary Figure 8-** Gating strategy of BM and spleen B cell populations. **(A)** Representative gating plots for total B220<sup>+</sup>, pro<sup>-</sup>, pre<sup>-</sup>, immature, and mature B cells in the BM of naïve and tumor-bearing mice. **(B)** Representative gating plots for total B, immature B, marginal zone B, and follicular B cells in the spleen of naïve and tumor-bearing mice.



# Supplementary Figure 9

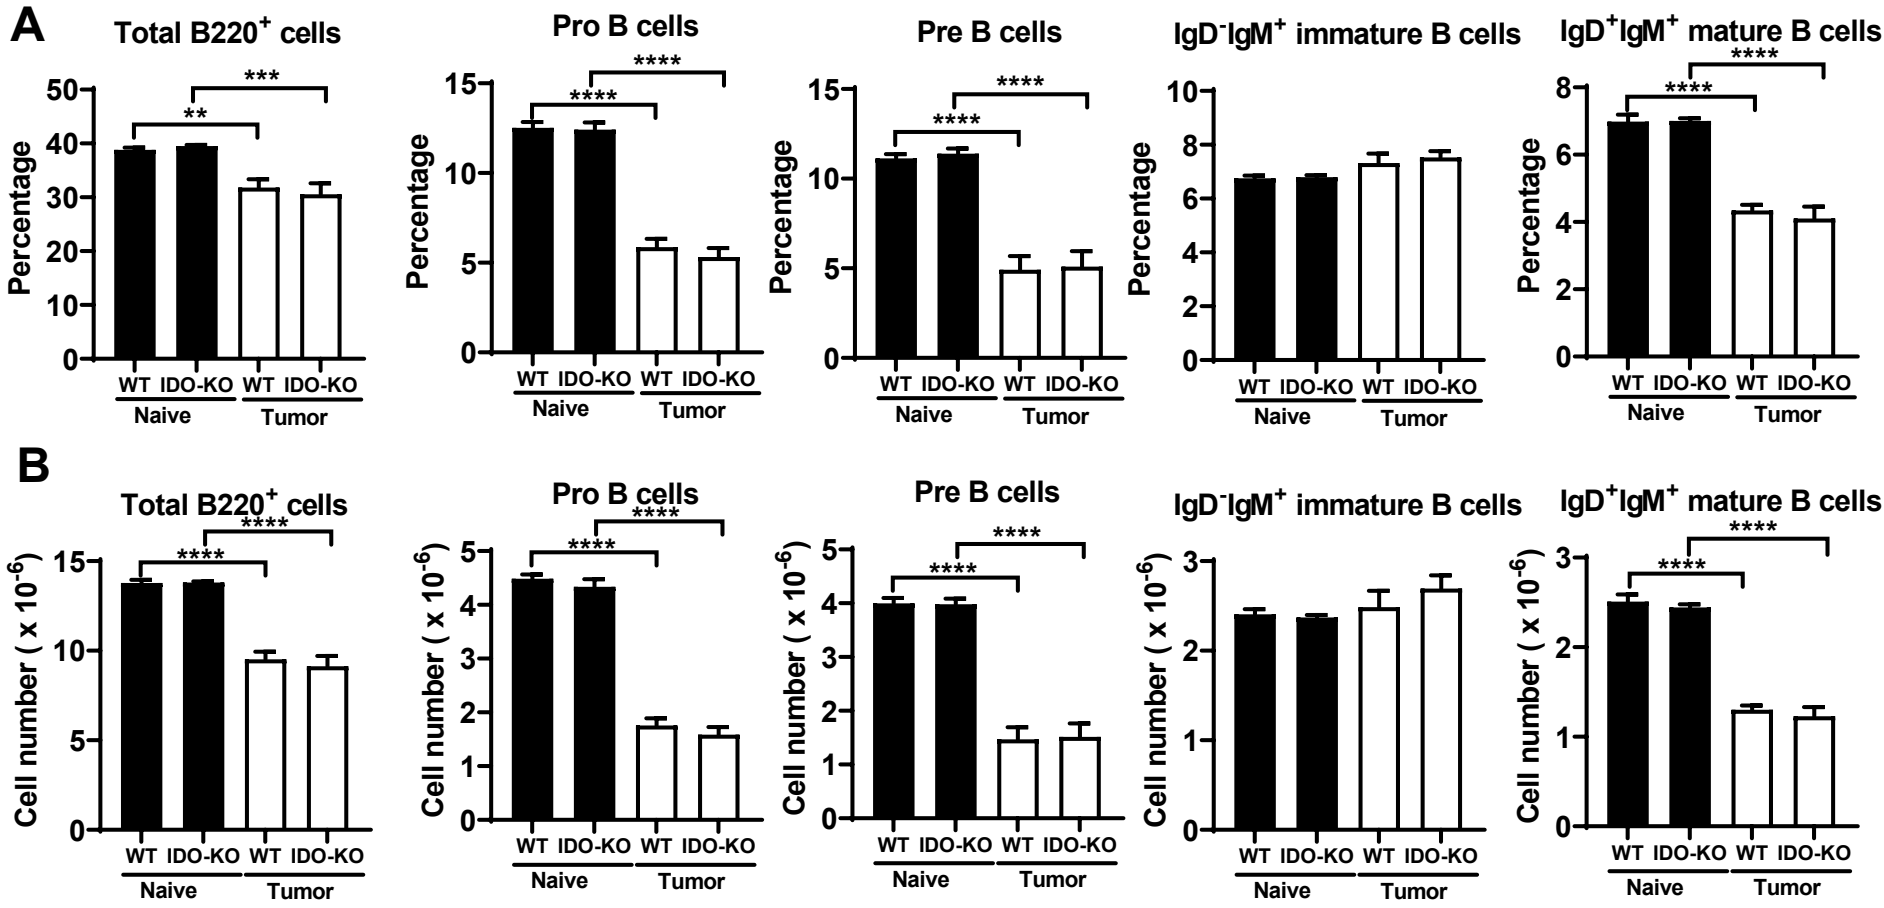

**Supplementary Figure 9- IDO deficiency does not affect B cell development in BM.** Percentages (**A**) and absolute numbers (**B**) of total B220<sup>+</sup>, pro-, pre-, immature B cells in BM of naïve or tumor-bearing WT and IDO KO mice on day 9 post-LLC i.c. challenge (n = 6 mice per group). Statistical significance was evaluated using one-way ANOVA with Tukey’s multiple comparison testing. \*\* *P* < 0.01, \*\*\* *P* < 0.001, \*\*\*\* *P* < 0.0001.

# Supplementary Figure 10

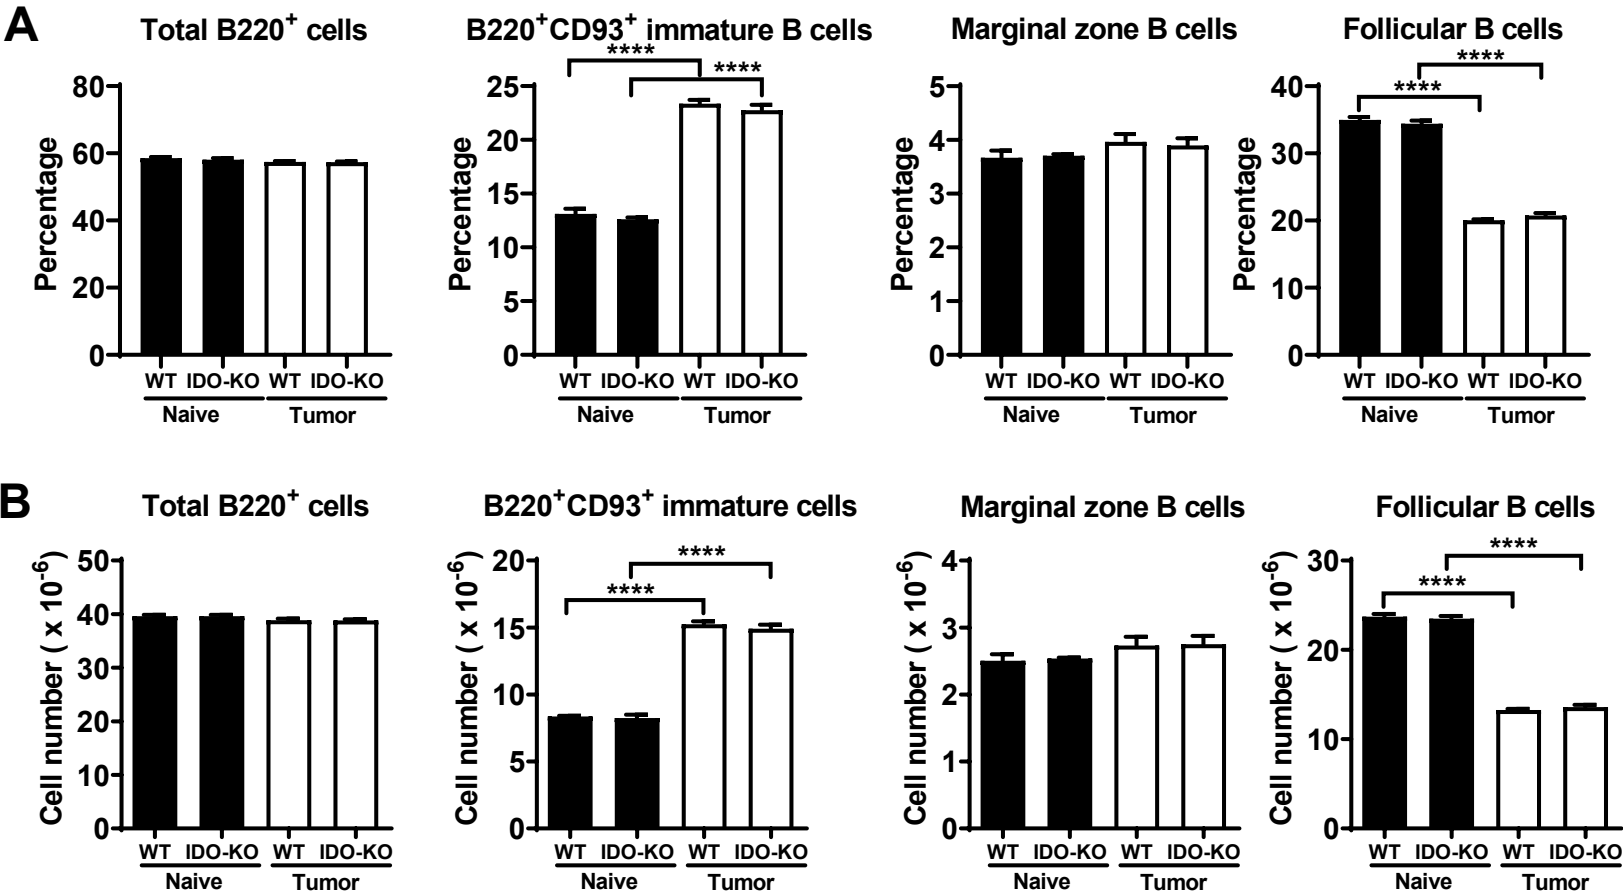

**Supplementary Figure 10-** IDO deficiency does not affect B cell development in spleen. Percentages and absolute numbers of total B220<sup>+</sup>, immature, marginal zone and follicular B cells in spleens of naïve or tumor-bearing WT and IDO KO mice on day 9 post-LLC i.c. challenge (n = 6 mice per group). Statistical significance was evaluated using one-way ANOVA with Tukey’s multiple comparison testing. \*\*\*\* *P* < 0.0001.

## Supplementary Figure 11

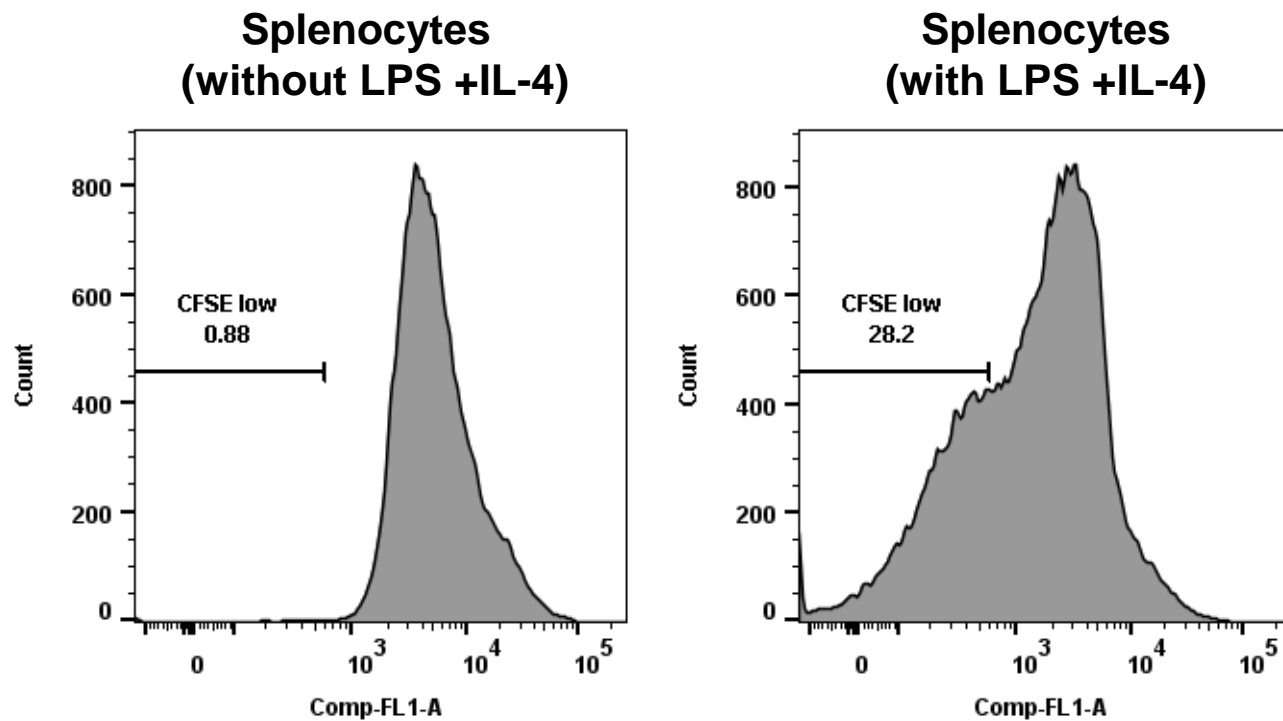

Supplementary Figure 11- Gating strategy to show CFSE low population
